CORRECTION

# Correction: MAGPIE: Simplifying access and execution of computational models in the life sciences

The *PLOS Computational Biology* Staff

The acknowledgments for this article should read as follows:

“We thank Dr. Hans H. Diebner, who advised us on the concepts of Star and Griesemer, who already in the late 80s identified the problems of interdisciplinary work and developed the theoretical concept of boundary objects.”

## Reference

1. Baldow C, Salentin S, Schroeder M, Roeder I, Glauche I (2017) MAGPIE: Simplifying access and execution of computational models in the life sciences. *PLoS Comput Biol* 13(12): e1005898. <https://doi.org/10.1371/journal.pcbi.1005898> PMID: 29244826

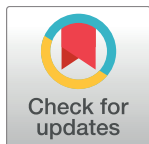

## OPEN ACCESS

**Citation:** The *PLOS Computational Biology* Staff (2018) Correction: MAGPIE: Simplifying access and execution of computational models in the life sciences. *PLoS Comput Biol* 14(3): e1006083. <https://doi.org/10.1371/journal.pcbi.1006083>

**Published:** March 26, 2018

**Copyright:** © 2018 The PLOS Computational Biology Staff. This is an open access article distributed under the terms of the [Creative Commons Attribution License](https://creativecommons.org/licenses/by/4.0/), which permits unrestricted use, distribution, and reproduction in any medium, provided the original author and source are credited.
